# Supplementary material for: Engineered Recombinant Single Chain Variable Fragment of Monoclonal Antibody Provides Protection to Chickens Infected with H9N2 Avian Influenza
Source: MDPI journal article supplement (doi:10.3390/vaccines8010118), 2020-03-03
Supplement: s1 [file s1]

### Directly infected bird weight gain (%)

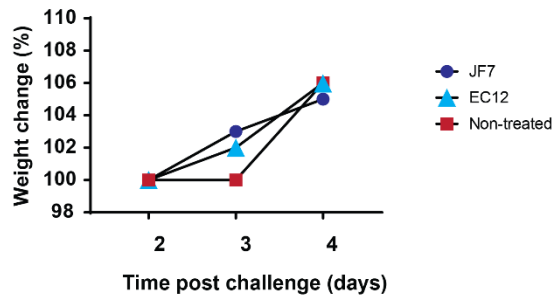

a)

### Contact bird weight gain (%)

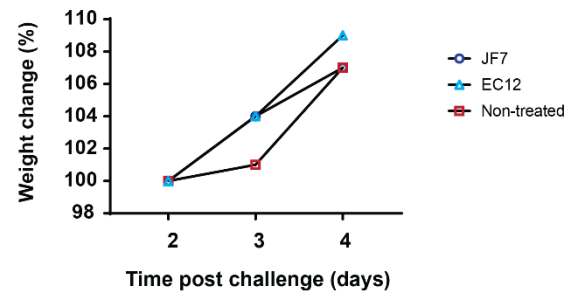

b)

**Figure S1.** Percentage (%) body mass changes of challenged chickens. Birds received scFv EC12 (300µg/dose) or scFv JF7 (200µg/dose) by intranasal route 24 hours before challenge with  $5 \times 10^5$  PFU of UDL-1/08 followed by daily treatment till day 7 post virus inoculation. Weight of chickens was measured on days 2, 3 and 4 post challenge and changes were calculated as % of initial weight recorded on day 2 post virus inoculation. (a) directly infected bird weight gain and (b) contact bird weight gain.
